# Supplementary material
Source: MDPI journal article supplement (https://www.mdpi.com/2073-4441/12/10/2731)
Supplement: s1 [file s1]

| Variables                                          | Winter average water temperature (°C) | Winter discharge (m <sup>3</sup> s <sup>-1</sup> ) | Winter NO <sub>3</sub> -N (μg l <sup>-1</sup> ) | Winter NH <sub>4</sub> -N (μg l <sup>-1</sup> ) | Winter Tot-N (μg l <sup>-1</sup> ) | Winter ON (μg l <sup>-1</sup> ) | Winter PO <sub>4</sub> -P (μg l <sup>-1</sup> ) | Winter Tot-P (μg l <sup>-1</sup> ) | Winter OP (μg l <sup>-1</sup> ) | Winter DOC (mg l <sup>-1</sup> ) | Winter precipitation (mm) | Winter average daily temperature (°C) |
|----------------------------------------------------|---------------------------------------|----------------------------------------------------|-------------------------------------------------|-------------------------------------------------|------------------------------------|---------------------------------|-------------------------------------------------|------------------------------------|---------------------------------|----------------------------------|---------------------------|---------------------------------------|
| Winter average water temperature (°C)              | <b>1</b>                              | <b>0.643</b>                                       | 0.369                                           | 0.372                                           | <b>0.500</b>                       | <b>0.574</b>                    | 0.362                                           | 0.332                              | 0.259                           | <b>0.762</b>                     | 0.406                     | <b>0.672</b>                          |
| Winter discharge (m <sup>3</sup> s <sup>-1</sup> ) | <b>0.643</b>                          | <b>1</b>                                           | <b>0.841</b>                                    | <b>0.656</b>                                    | <b>0.882</b>                       | 0.404                           | <b>0.661</b>                                    | <b>0.652</b>                       | <b>0.563</b>                    | <b>0.884</b>                     | <b>0.653</b>              | <b>0.775</b>                          |
| Winter NO <sub>3</sub> -N (μg l <sup>-1</sup> )    | 0.369                                 | <b>0.841</b>                                       | <b>1</b>                                        | <b>0.463</b>                                    | <b>0.967</b>                       | 0.269                           | <b>0.564</b>                                    | <b>0.531</b>                       | 0.422                           | <b>0.682</b>                     | <b>0.591</b>              | <b>0.569</b>                          |
| Winter NH <sub>4</sub> -N (μg l <sup>-1</sup> )    | 0.372                                 | <b>0.656</b>                                       | <b>0.463</b>                                    | <b>1</b>                                        | <b>0.484</b>                       | 0.012                           | <b>0.808</b>                                    | <b>0.828</b>                       | <b>0.751</b>                    | <b>0.498</b>                     | <b>0.458</b>              | <b>0.451</b>                          |
| Winter Tot-N (μg l <sup>-1</sup> )                 | <b>0.500</b>                          | <b>0.882</b>                                       | <b>0.967</b>                                    | <b>0.484</b>                                    | <b>1</b>                           | <b>0.496</b>                    | <b>0.573</b>                                    | <b>0.533</b>                       | 0.416                           | <b>0.785</b>                     | <b>0.684</b>              | <b>0.635</b>                          |
| Winter ON (μg l <sup>-1</sup> )                    | <b>0.574</b>                          | 0.404                                              | 0.269                                           | 0.012                                           | <b>0.496</b>                       | <b>1</b>                        | 0.085                                           | 0.032                              | -0.028                          | <b>0.601</b>                     | <b>0.530</b>              | 0.414                                 |
| Winter PO <sub>4</sub> -P (μg l <sup>-1</sup> )    | 0.362                                 | <b>0.661</b>                                       | <b>0.564</b>                                    | <b>0.808</b>                                    | <b>0.573</b>                       | 0.085                           | <b>1</b>                                        | <b>0.957</b>                       | <b>0.788</b>                    | <b>0.509</b>                     | <b>0.464</b>              | <b>0.491</b>                          |
| Winter Tot-P (μg l <sup>-1</sup> )                 | 0.332                                 | <b>0.652</b>                                       | <b>0.531</b>                                    | <b>0.828</b>                                    | <b>0.533</b>                       | 0.032                           | <b>0.957</b>                                    | <b>1</b>                           | <b>0.932</b>                    | <b>0.524</b>                     | <b>0.469</b>              | <b>0.466</b>                          |
| Winter OP (μg l <sup>-1</sup> )                    | 0.259                                 | <b>0.563</b>                                       | 0.422                                           | <b>0.751</b>                                    | 0.416                              | -0.028                          | <b>0.788</b>                                    | <b>0.932</b>                       | <b>1</b>                        | <b>0.484</b>                     | 0.430                     | 0.384                                 |
| Winter DOC (mg l <sup>-1</sup> )                   | <b>0.762</b>                          | <b>0.884</b>                                       | <b>0.682</b>                                    | <b>0.498</b>                                    | <b>0.785</b>                       | <b>0.601</b>                    | <b>0.509</b>                                    | <b>0.524</b>                       | <b>0.484</b>                    | <b>1</b>                         | <b>0.722</b>              | <b>0.717</b>                          |
| Winter precipitation (mm)                          | 0.406                                 | <b>0.653</b>                                       | <b>0.591</b>                                    | <b>0.458</b>                                    | <b>0.684</b>                       | <b>0.530</b>                    | <b>0.464</b>                                    | <b>0.469</b>                       | 0.430                           | <b>0.722</b>                     | <b>1</b>                  | <b>0.548</b>                          |
| Winter average daily temperature (°C)              | <b>0.672</b>                          | <b>0.775</b>                                       | <b>0.569</b>                                    | 0.451                                           | <b>0.635</b>                       | 0.414                           | <b>0.491</b>                                    | <b>0.466</b>                       | 0.384                           | <b>0.717</b>                     | <b>0.548</b>              | <b>1</b>                              |
| Variables                                          | Spring average water temperature (°C) | Spring discharge (m <sup>3</sup> s <sup>-1</sup> ) | Spring NO <sub>3</sub> -N (μg l <sup>-1</sup> ) | Spring NH <sub>4</sub> -N (μg l <sup>-1</sup> ) | Spring Tot-N (μg l <sup>-1</sup> ) | Spring ON (μg l <sup>-1</sup> ) | Spring PO <sub>4</sub> -P (μg l <sup>-1</sup> ) | Spring Tot-P (μg l <sup>-1</sup> ) | Spring OP (μg l <sup>-1</sup> ) | Spring DOC (mg l <sup>-1</sup> ) | Spring precipitation (mm) | Spring average daily temperature (°C) |
| Spring average water temperature (°C)              | <b>1</b>                              | 0.066                                              | -0.209                                          | -0.192                                          | -0.165                             | 0.179                           | -0.391                                          | -0.324                             | -0.113                          | -0.017                           | -0.283                    | 0.360                                 |
| Spring discharge (m <sup>3</sup> s <sup>-1</sup> ) | 0.066                                 | <b>1</b>                                           | <b>0.474</b>                                    | -0.019                                          | 0.411                              | -0.055                          | 0.133                                           | 0.079                              | 0.028                           | 0.233                            | <b>0.472</b>              | 0.075                                 |
| Spring NO <sub>3</sub> -N (μg l <sup>-1</sup> )    | -0.209                                | <b>0.474</b>                                       | <b>1</b>                                        | 0.115                                           | <b>0.849</b>                       | -0.243                          | 0.425                                           | 0.231                              | -0.001                          | -0.028                           | 0.165                     | 0.058                                 |
| Spring NH <sub>4</sub> -N (μg l <sup>-1</sup> )    | -0.192                                | -0.019                                             | 0.115                                           | <b>1</b>                                        | <b>0.549</b>                       | <b>0.634</b>                    | <b>0.520</b>                                    | <b>0.697</b>                       | <b>0.547</b>                    | <b>0.751</b>                     | 0.159                     | 0.022                                 |
| Spring Tot-N (μg l <sup>-1</sup> )                 | -0.165                                | 0.411                                              | <b>0.849</b>                                    | <b>0.549</b>                                    | <b>1</b>                           | 0.278                           | <b>0.562</b>                                    | <b>0.511</b>                       | 0.274                           | <b>0.359</b>                     | 0.212                     | 0.088                                 |
| Spring ON (μg l <sup>-1</sup> )                    | 0.179                                 | -0.055                                             | -0.243                                          | <b>0.634</b>                                    | 0.278                              | <b>1</b>                        | 0.224                                           | <b>0.479</b>                       | <b>0.549</b>                    | <b>0.598</b>                     | 0.115                     | 0.081                                 |
| Spring PO <sub>4</sub> -P (μg l <sup>-1</sup> )    | -0.391                                | 0.133                                              | 0.425                                           | <b>0.520</b>                                    | <b>0.562</b>                       | 0.224                           | <b>1</b>                                        | <b>0.872</b>                       | <b>0.466</b>                    | 0.330                            | 0.170                     | 0.021                                 |
| Spring Tot-P (μg l <sup>-1</sup> )                 | -0.324                                | 0.079                                              | 0.231                                           | <b>0.697</b>                                    | <b>0.511</b>                       | <b>0.479</b>                    | <b>0.872</b>                                    | <b>1</b>                           | <b>0.812</b>                    | 0.414                            | 0.056                     | -0.132                                |
| Spring OP (μg l <sup>-1</sup> )                    | -0.113                                | 0.028                                              | -0.001                                          | <b>0.547</b>                                    | 0.274                              | <b>0.549</b>                    | <b>0.466</b>                                    | <b>0.812</b>                       | <b>1</b>                        | 0.265                            | -0.031                    | -0.241                                |
| Spring DOC (mg l <sup>-1</sup> )                   | -0.017                                | 0.233                                              | -0.028                                          | <b>0.751</b>                                    | 0.359                              | <b>0.598</b>                    | 0.330                                           | 0.414                              | 0.265                           | <b>1</b>                         | 0.390                     | 0.383                                 |
| Spring precipitation (mm)                          | -0.283                                | <b>0.472</b>                                       | 0.165                                           | 0.159                                           | 0.212                              | 0.115                           | 0.170                                           | 0.056                              | -0.031                          | 0.390                            | <b>1</b>                  | 0.257                                 |
| Spring average daily temperature (°C)              | 0.360                                 | 0.075                                              | 0.058                                           | 0.022                                           | 0.088                              | 0.081                           | 0.021                                           | -0.132                             | -0.241                          | 0.383                            | 0.257                     | <b>1</b>                              |
| Variables                                          | Summer average water temperature (°C) | Summer discharge (m <sup>3</sup> s <sup>-1</sup> ) | Summer NO <sub>3</sub> -N (μg l <sup>-1</sup> ) | Summer NH <sub>4</sub> -N (μg l <sup>-1</sup> ) | Summer Tot-N (μg l <sup>-1</sup> ) | Summer ON (μg l <sup>-1</sup> ) | Summer PO <sub>4</sub> -P (μg l <sup>-1</sup> ) | Summer Tot-P (μg l <sup>-1</sup> ) | Summer OP (μg l <sup>-1</sup> ) | Summer DOC (mg l <sup>-1</sup> ) | Summer precipitation (mm) | Summer average daily temperature (°C) |
| Summer average water temperature (°C)              | <b>1</b>                              | <b>-0.541</b>                                      | -0.334                                          | -0.235                                          | -0.364                             | -0.254                          | -0.256                                          | -0.200                             | -0.134                          | <b>-0.499</b>                    | <b>-0.497</b>             | <b>0.597</b>                          |
| Summer discharge (m <sup>3</sup> s <sup>-1</sup> ) | <b>-0.541</b>                         | <b>1</b>                                           | <b>0.594</b>                                    | 0.284                                           | <b>0.719</b>                       | <b>0.707</b>                    | -0.012                                          | 0.198                              | 0.323                           | <b>0.788</b>                     | <b>0.923</b>              | <b>-0.472</b>                         |
| Summer NO <sub>3</sub> -N (μg l <sup>-1</sup> )    | -0.334                                | <b>0.594</b>                                       | <b>1</b>                                        | 0.222                                           | <b>0.941</b>                       | <b>0.467</b>                    | 0.207                                           | 0.318                              | 0.367                           | <b>0.361</b>                     | <b>0.495</b>              | <b>-0.293</b>                         |
| Summer NH <sub>4</sub> -N (μg l <sup>-1</sup> )    | -0.235                                | 0.284                                              | 0.222                                           | <b>1</b>                                        | 0.397                              | 0.390                           | <b>0.642</b>                                    | <b>0.875</b>                       | <b>0.910</b>                    | <b>0.696</b>                     | 0.296                     | -0.326                                |
| Summer Tot-N (μg l <sup>-1</sup> )                 | -0.364                                | <b>0.719</b>                                       | <b>0.941</b>                                    | 0.397                                           | <b>1</b>                           | <b>0.728</b>                    | 0.294                                           | 0.451                              | <b>0.513</b>                    | <b>0.575</b>                     | <b>0.652</b>              | -0.410                                |
| Summer ON (μg l <sup>-1</sup> )                    | -0.254                                | <b>0.707</b>                                       | <b>0.467</b>                                    | 0.390                                           | <b>0.728</b>                       | <b>1</b>                        | 0.222                                           | 0.371                              | 0.432                           | <b>0.692</b>                     | <b>0.730</b>              | <b>-0.458</b>                         |
| Summer PO <sub>4</sub> -P (μg l <sup>-1</sup> )    | -0.256                                | -0.012                                             | 0.207                                           | <b>0.642</b>                                    | 0.294                              | 0.222                           | <b>1</b>                                        | <b>0.877</b>                       | <b>0.663</b>                    | 0.295                            | -0.070                    | -0.339                                |
| Summer Tot-P (μg l <sup>-1</sup> )                 | -0.200                                | 0.198                                              | 0.318                                           | <b>0.875</b>                                    | 0.451                              | 0.371                           | <b>0.877</b>                                    | <b>1</b>                           | <b>0.941</b>                    | <b>0.555</b>                     | 0.169                     | -0.312                                |
| Summer OP (μg l <sup>-1</sup> )                    | -0.134                                | 0.323                                              | 0.367                                           | <b>0.910</b>                                    | <b>0.513</b>                       | 0.432                           | <b>0.663</b>                                    | <b>0.941</b>                       | <b>1</b>                        | <b>0.661</b>                     | 0.314                     | -0.244                                |
| Summer DOC (mg l <sup>-1</sup> )                   | <b>-0.499</b>                         | <b>0.788</b>                                       | 0.361                                           | <b>0.696</b>                                    | <b>0.575</b>                       | <b>0.692</b>                    | 0.295                                           | <b>0.555</b>                       | <b>0.661</b>                    | <b>1</b>                         | <b>0.773</b>              | <b>-0.535</b>                         |
| Summer precipitation (mm)                          | <b>-0.497</b>                         | <b>0.923</b>                                       | <b>0.495</b>                                    | 0.296                                           | <b>0.652</b>                       | <b>0.730</b>                    | -0.070                                          | 0.169                              | 0.314                           | <b>0.773</b>                     | <b>1</b>                  | <b>-0.550</b>                         |
| Summer average daily temperature (°C)              | <b>0.597</b>                          | <b>-0.472</b>                                      | -0.293                                          | -0.326                                          | -0.410                             | <b>-0.458</b>                   | -0.339                                          | -0.312                             | -0.244                          | <b>-0.535</b>                    | <b>-0.550</b>             | <b>1</b>                              |
| Variables                                          | Autumn average water temperature (°C) | Autumn discharge (m <sup>3</sup> s <sup>-1</sup> ) | Autumn NO <sub>3</sub> -N (μg l <sup>-1</sup> ) | Autumn NH <sub>4</sub> -N (μg l <sup>-1</sup> ) | Autumn Tot-N (μg l <sup>-1</sup> ) | Autumn ON (μg l <sup>-1</sup> ) | Autumn PO <sub>4</sub> -P (μg l <sup>-1</sup> ) | Autumn Tot-P (μg l <sup>-1</sup> ) | Autumn OP (μg l <sup>-1</sup> ) | Autumn DOC (mg l <sup>-1</sup> ) | Autumn precipitation (mm) | Autumn average daily temperature (°C) |
| Autumn average water temperature (°C)              | <b>1</b>                              | 0.303                                              | 0.166                                           | -0.380                                          | 0.143                              | 0.136                           | -0.166                                          | -0.121                             | -0.027                          | 0.310                            | 0.369                     | <b>0.883</b>                          |
| Autumn discharge (m <sup>3</sup> s <sup>-1</sup> ) | 0.303                                 | <b>1</b>                                           | <b>0.697</b>                                    | 0.401                                           | <b>0.851</b>                       | <b>0.768</b>                    | <b>0.462</b>                                    | <b>0.579</b>                       | <b>0.668</b>                    | <b>0.920</b>                     | <b>0.741</b>              | 0.210                                 |
| Autumn NO <sub>3</sub> -N (μg l <sup>-1</sup> )    | 0.166                                 | <b>0.697</b>                                       | <b>1</b>                                        | 0.351                                           | <b>0.938</b>                       | 0.311                           | <b>0.674</b>                                    | <b>0.683</b>                       | <b>0.593</b>                    | <b>0.612</b>                     | 0.371                     | 0.319                                 |
| Autumn NH <sub>4</sub> -N (μg l <sup>-1</sup> )    | -0.380                                | 0.401                                              | 0.351                                           | <b>1</b>                                        | <b>0.486</b>                       | 0.335                           | <b>0.850</b>                                    | <b>0.871</b>                       | <b>0.759</b>                    | <b>0.496</b>                     | 0.401                     | -0.306                                |
| Autumn Tot-N (μg l <sup>-1</sup> )                 | 0.143                                 | <b>0.851</b>                                       | <b>0.938</b>                                    | <b>0.486</b>                                    | <b>1</b>                           | <b>0.610</b>                    | <b>0.679</b>                                    | <b>0.752</b>                       | <b>0.752</b>                    | <b>0.803</b>                     | <b>0.503</b>              | 0.230                                 |
| Autumn ON (μg l <sup>-1</sup> )                    | 0.136                                 | <b>0.768</b>                                       | 0.311                                           | 0.335                                           | <b>0.610</b>                       | <b>1</b>                        | 0.176                                           | 0.372                              | <b>0.624</b>                    | <b>0.802</b>                     | <b>0.505</b>              | 0.005                                 |
| Autumn PO <sub>4</sub> -P (μg l <sup>-1</sup> )    | -0.166                                | <b>0.462</b>                                       | <b>0.674</b>                                    | <b>0.850</b>                                    | <b>0.679</b>                       | 0.176                           | <b>1</b>                                        | <b>0.960</b>                       | <b>0.743</b>                    | <b>0.476</b>                     | 0.429                     | -0.023                                |
| Autumn Tot-P (μg l <sup>-1</sup> )                 | -0.121                                | <b>0.579</b>                                       | <b>0.683</b>                                    | <b>0.871</b>                                    | <b>0.752</b>                       | <b>0.372</b>                    | <b>0.960</b>                                    | <b>1</b>                           | <b>0.900</b>                    | <b>0.626</b>                     | <b>0.520</b>              | 0.016                                 |
| Autumn OP (μg l <sup>-1</sup> )                    | -0.027                                | <b>0.668</b>                                       | <b>0.593</b>                                    | <b>0.759</b>                                    | <b>0.752</b>                       | <b>0.624</b>                    | <b>0.743</b>                                    | <b>0.900</b>                       | <b>1</b>                        | <b>0.757</b>                     | <b>0.570</b>              | 0.077                                 |
| Autumn DOC (mg l <sup>-1</sup> )                   | 0.310                                 | <b>0.920</b>                                       | <b>0.612</b>                                    | <b>0.496</b>                                    | <b>0.803</b>                       | <b>0.802</b>                    | <b>0.476</b>                                    | <b>0.626</b>                       | <b>0.757</b>                    | <b>1</b>                         | <b>0.711</b>              | 0.239                                 |
| Autumn precipitation (mm)                          | 0.369                                 | <b>0.741</b>                                       | 0.371                                           | 0.401                                           | <b>0.503</b>                       | <b>0.505</b>                    | 0.429                                           | <b>0.520</b>                       | <b>0.570</b>                    | <b>0.711</b>                     | <b>1</b>                  | 0.227                                 |
| Autumn average daily temperature (°C)              | <b>0.883</b>                          | 0.210                                              | 0.319                                           | -0.306                                          | 0.230                              | 0.005                           | -0.023                                          | 0.016                              | 0.077                           | 0.239                            | 0.227                     | <b>1</b>                              |
