# Supplementary material
Source: MDPI journal article supplement (https://www.mdpi.com/2073-4441/12/10/2731)
Supplement: s1 [file s1]

| Season                | Variable                                           | Observations | Minimum | Maximum | Mean | Std. deviation |
|-----------------------|----------------------------------------------------|--------------|---------|---------|------|----------------|
| Winter<br>(XII - II)  | Average air temperature (C°)                       | 19           | -10.5   | 0.0     | -5.1 | 2.8            |
|                       | Average water temperature (C°)                     | 19           | -0.1    | 1.72    | 0.9  | 0.47           |
|                       | Precipitation (mm)                                 | 19           | 0.63    | 2.37    | 1.6  | 0.49           |
|                       | Stream discharge (m <sup>3</sup> s <sup>-1</sup> ) | 19           | 0.01    | 0.11    | 0.05 | 0.03           |
|                       | NO <sub>3</sub> -N (µg l <sup>-1</sup> )           | 19           | 1288    | 4321    | 2614 | 729            |
|                       | NH <sub>4</sub> -N (µg l <sup>-1</sup> )           | 19           | 73      | 379     | 132  | 73             |
|                       | Tot-N (µg l <sup>-1</sup> )                        | 19           | 1735    | 4982    | 3189 | 852            |
|                       | ON (µg l <sup>-1</sup> )                           | 19           | 105     | 1070    | 442  | 227            |
|                       | PO <sub>4</sub> -P (µg l <sup>-1</sup> )           | 19           | 3.4     | 37.0    | 10.6 | 9.0            |
|                       | Tot-P (µg l <sup>-1</sup> )                        | 19           | 18.9    | 75.3    | 34.4 | 15.3           |
|                       | OP (µg l <sup>-1</sup> )                           | 19           | 14.8    | 38.7    | 23.8 | 7.3            |
|                       | DOC (mg l <sup>-1</sup> )                          | 19           | 3.8     | 11.9    | 7.4  | 2.2            |
| Spring<br>(III - V)   | Average air temperature (C°)                       | 20           | 1.72    | 5.52    | 3.9  | 1.07           |
|                       | Average water temperature (C°)                     | 20           | 2.69    | 5.92    | 4.2  | 0.84           |
|                       | Precipitation (mm)                                 | 20           | 0.73    | 1.91    | 1.2  | 0.30           |
|                       | Stream discharge (m <sup>3</sup> s <sup>-1</sup> ) | 20           | 0.04    | 0.10    | 0.07 | 0.01           |
|                       | NO <sub>3</sub> -N (µg l <sup>-1</sup> )           | 20           | 1820    | 3852    | 2571 | 580            |
|                       | NH <sub>4</sub> -N (µg l <sup>-1</sup> )           | 20           | 101     | 495     | 166  | 99             |
|                       | Tot-N (µg l <sup>-1</sup> )                        | 20           | 2509    | 4723    | 3301 | 615            |
|                       | ON (µg l <sup>-1</sup> )                           | 20           | 259     | 1275    | 545  | 242            |
|                       | PO <sub>4</sub> -P (µg l <sup>-1</sup> )           | 20           | 5.7     | 39.1    | 13.7 | 8.9            |
|                       | Tot-P (µg l <sup>-1</sup> )                        | 20           | 33.7    | 81.0    | 49.8 | 14.3           |
|                       | OP (µg l <sup>-1</sup> )                           | 20           | 15.3    | 52.4    | 35.2 | 8.4            |
|                       | DOC (mg l <sup>-1</sup> )                          | 20           | 7.5     | 13.1    | 9.5  | 1.2            |
| Summer<br>(VI - VIII) | Average air temperature (C°)                       | 19           | 13.85   | 17.05   | 15.6 | 1.03           |
|                       | Average water temperature (C°)                     | 19           | 9.31    | 16.81   | 13.6 | 1.65           |
|                       | Precipitation (mm)                                 | 19           | 1.32    | 4.49    | 2.3  | 0.72           |
|                       | Stream discharge (m <sup>3</sup> s <sup>-1</sup> ) | 19           | 0.02    | 0.08    | 0.03 | 0.01           |
|                       | NO <sub>3</sub> -N (µg l <sup>-1</sup> )           | 19           | 830     | 2541    | 1716 | 415            |
|                       | NH <sub>4</sub> -N (µg l <sup>-1</sup> )           | 19           | 25      | 215     | 73   | 52             |
|                       | Tot-N (µg l <sup>-1</sup> )                        | 19           | 1099    | 3534    | 2253 | 541            |
|                       | ON (µg l <sup>-1</sup> )                           | 19           | 211     | 884     | 463  | 181            |
|                       | PO <sub>4</sub> -P (µg l <sup>-1</sup> )           | 19           | 4.6     | 35.5    | 11.2 | 7.3            |
|                       | Tot-P (µg l <sup>-1</sup> )                        | 19           | 24.0    | 91.5    | 41.7 | 16.0           |
|                       | OP (µg l <sup>-1</sup> )                           | 19           | 19.4    | 56.1    | 30.4 | 10.3           |
|                       | DOC (mg l <sup>-1</sup> )                          | 19           | 6.4     | 14.9    | 9.2  | 2.4            |
| Autumn<br>(IX - XI)   | Average air temperature (C°)                       | 19           | 1.56    | 7.12    | 5.2  | 1.28           |
|                       | Average water temperature (C°)                     | 19           | 4.00    | 7.61    | 6.3  | 0.86           |
|                       | Precipitation (mm)                                 | 19           | 1.16    | 3.13    | 2.0  | 0.65           |
|                       | Stream discharge (m <sup>3</sup> s <sup>-1</sup> ) | 19           | 0.02    | 0.10    | 0.05 | 0.02           |
|                       | NO <sub>3</sub> -N (µg l <sup>-1</sup> )           | 19           | 1137    | 3758    | 2090 | 534            |
|                       | NH <sub>4</sub> -N (µg l <sup>-1</sup> )           | 19           | 33      | 263     | 94   | 61             |
|                       | Tot-N (µg l <sup>-1</sup> )                        | 19           | 1703    | 4615    | 2671 | 663            |
|                       | ON (µg l <sup>-1</sup> )                           | 19           | 172     | 848     | 486  | 219            |
|                       | PO <sub>4</sub> -P (µg l <sup>-1</sup> )           | 19           | 4.5     | 45.8    | 11.5 | 11.4           |
|                       | Tot-P (µg l <sup>-1</sup> )                        | 19           | 22.7    | 84.6    | 34.7 | 17.5           |
|                       | OP (µg l <sup>-1</sup> )                           | 19           | 14.9    | 38.8    | 23.1 | 7.3            |
|                       | DOC (mg l <sup>-1</sup> )                          | 19           | 4.8     | 16.1    | 9.6  | 3.2            |
